# Supplementary material
Source: PubMed Central journal article supplement (PMC8028564)
Supplement: BPA-28-43-s001.pdf [file BPA-28-43-s001.pdf]

### Supplementary Tables

**Table I:** mRNA expression levels of genes encoding subunits of the mitochondrial complexes and energy metabolism-related enzymes in the frontal cortex MA, iPD, PD and PDD as determined with TaqMan PCR assays using *GUS-β* for normalization. Note marked differences in gene expression between MA and PD, mostly characterized by up-regulated gene expression, and between PD and PDD, with dramatic down-regulation of the majority of mitochondrial subunits assessed. Subunits are not limited to a single complex but members of all the mitochondrial complexes are affected in PDD. A more complex scenario occurs in the expression of other energy metabolism-related enzymes at different stages of disease. However, important decay in gene expression is also observed in PDD when compared with PD. Student's T-test \**p* < 0.05, \*\**p* < 0.01, \*\*\**p* < 0.001. <sup>a</sup> No Gaussian distribution (Mann Whitney test \**p* < 0.05, \*\**p* < 0.01, \*\*\**p* < 0.001).

|                                            |                 | Frontal cortex           |             |                          |             |         |        |         |         |         |         |
|--------------------------------------------|-----------------|--------------------------|-------------|--------------------------|-------------|---------|--------|---------|---------|---------|---------|
|                                            |                 | MA                       | iPD         | PD                       | PDD         | MAvsIPD | MAvsPD | iPDvsPD | MAvsPDD | iPDvsPD | PDvsPDD |
| <b>Mitochondrial elements</b>              |                 |                          |             |                          |             |         |        |         |         |         |         |
| Complex I                                  | <i>NDUFA2</i>   | 1.08 ± 0.46              | 0.75 ± 0.49 | 1.20 ± 0.44              | 0.60 ± 0.36 | -       | -      | ↑*      | -       | -       | -       |
|                                            | <i>NDUFA7</i>   | 1.08 ± 0.38 <sup>a</sup> | 0.94 ± 0.56 | 1.65 ± 0.44              | 0.62 ± 0.37 | -       | ↑**    | ↑**     | -       | -       | ↓**     |
|                                            | <i>NDUFA10</i>  | 1.07 ± 0.36              | 1.09 ± 0.52 | 1.68 ± 0.53 <sup>b</sup> | 0.81 ± 0.43 | -       | ↑**    | ↑*      | -       | -       | ↓*      |
|                                            | <i>NDUFB3</i>   | 1.08 ± 0.42              | 0.67 ± 0.47 | 1.33 ± 0.46              | 0.95 ± 0.45 | ↓*      | -      | ↑**     | -       | -       | -       |
|                                            | <i>NDUFB7</i>   | 1.07 ± 0.40              | 1.15 ± 0.63 | 1.67 ± 0.76              | 0.60 ± 0.29 | -       | ↑*     | -       | -       | -       | ↓*      |
|                                            | <i>NDUFB10</i>  | 1.10 ± 0.45              | 1.14 ± 0.74 | 1.58 ± 0.42              | 0.74 ± 0.47 | -       | ↑*     | -       | -       | -       | ↓*      |
|                                            | <i>NDUFS7</i>   | 1.02 ± 0.19              | 0.98 ± 0.30 | 1.17 ± 0.41 <sup>b</sup> | 0.75 ± 0.33 | -       | -      | -       | -       | -       | -       |
|                                            | <i>NDUFS8</i>   | 1.10 ± 0.45              | 1.16 ± 0.62 | 1.58 ± 0.49              | 0.82 ± 0.37 | -       | ↑*     | -       | -       | -       | ↓*      |
| Complex II                                 | <i>SDHB</i>     | 1.04 ± 0.30              | 1.05 ± 0.67 | 1.40 ± 0.46              | 0.49 ± 0.43 | -       | ↑*     | -       | ↓*      | -       | ↓*      |
| Complex III                                | <i>UQCRCB</i>   | 1.07 ± 0.41              | 0.94 ± 0.66 | 1.33 ± 0.49              | 0.55 ± 0.42 | -       | -      | -       | -       | -       | ↓*      |
|                                            | <i>UQCRC11</i>  | 1.04 ± 0.31              | 1.00 ± 0.70 | 1.44 ± 0.51              | 0.73 ± 0.40 | -       | ↑*     | -       | -       | -       | -       |
| Complex IV                                 | <i>COX7A2L</i>  | 1.17 ± 0.53              | 1.19 ± 0.87 | 1.76 ± 0.49              | 0.70 ± 0.44 | -       | ↑*     | -       | -       | -       | ↓**     |
|                                            | <i>COX7C</i>    | 1.10 ± 0.46              | 0.77 ± 0.59 | 1.12 ± 0.42              | 0.50 ± 0.31 | -       | -      | -       | ↓*      | -       | ↓*      |
| Complex V                                  | <i>ATP5D</i>    | 1.12 ± 0.55              | 0.91 ± 0.63 | 1.26 ± 0.62              | 0.84 ± 0.47 | -       | -      | -       | -       | -       | -       |
|                                            | <i>ATP5G2</i>   | 1.04 ± 0.28              | 1.02 ± 0.41 | 1.37 ± 0.31 <sup>b</sup> | 0.60 ± 0.43 | -       | ↑*     | ↑*      | ↓*      | -       | ↓**     |
|                                            | <i>ATP5H</i>    | 1.08 ± 0.43              | 0.64 ± 0.34 | 1.14 ± 0.41              | 0.59 ± 0.40 | ↓**     | -      | ↑**     | -       | -       | -       |
|                                            | <i>ATP5L</i>    | 1.12 ± 0.66              | 1.24 ± 0.72 | 1.66 ± 0.44              | 0.66 ± 0.36 | -       | -      | ↑*      | -       | -       | ↓**     |
|                                            | <i>ATP5O</i>    | 1.06 ± 0.40              | 0.91 ± 0.52 | 1.19 ± 0.37              | 0.60 ± 0.39 | -       | -      | -       | -       | -       | ↓*      |
| <b>Energy metabolism-related molecules</b> |                 |                          |             |                          |             |         |        |         |         |         |         |
|                                            | <i>ATP2B3</i>   | 1.09 ± 0.43              | 0.85 ± 0.62 | 1.30 ± 0.58              | 0.76 ± 0.49 | -       | -      | -       | -       | -       | -       |
|                                            | <i>ATP2B4</i>   | 1.06 ± 0.35              | 0.70 ± 0.39 | 1.39 ± 0.55              | 0.59 ± 0.32 | ↓*      | -      | ↑**     | ↓*      | -       | ↓*      |
|                                            | <i>ATP4A</i>    | 1.14 ± 0.78              | 1.94 ± 0.99 | 3.04 ± 2.15              | 0.68 ± 0.24 | ↑*      | -      | ↑**     | -       | -       | -       |
|                                            | <i>ATP6V0A1</i> | 1.10 ± 0.44              | 0.82 ± 0.42 | 1.52 ± 0.54              | 0.65 ± 0.38 | -       | -      | ↑**     | -       | -       | ↓*      |
|                                            | <i>ATP6V0B</i>  | 1.10 ± 0.14              | 0.81 ± 0.20 | 1.52 ± 0.56              | 0.72 ± 0.42 | ↓**     | -      | ↑**     | ↓**     | -       | ↓*      |
|                                            | <i>ATP6V1H</i>  | 1.33 ± 0.73              | 1.34 ± 1.09 | 1.98 ± 0.72              | 0.50 ± 0.40 | -       | -      | -       | -       | -       | ↓**     |
|                                            | <i>FAM82A2</i>  | 1.07 ± 0.38              | 1.05 ± 0.43 | 1.42 ± 0.70              | 0.51 ± 0.25 | -       | -      | -       | ↓*      | -       | -       |
|                                            | <i>LHPP</i>     | 1.04 ± 0.31 <sup>b</sup> | 1.06 ± 0.43 | 1.15 ± 0.52              | 0.60 ± 0.23 | -       | -      | -       | ↓*      | -       | -       |
|                                            | <i>SLC6A6</i>   | 1.05 ± 0.45              | 1.38 ± 0.48 | 1.15 ± 0.60              | 0.90 ± 0.31 | -       | -      | -       | -       | -       | -       |
|                                            | <i>SLC25A31</i> | 1.11 ± 0.51              | 1.06 ± 0.49 | 1.04 ± 0.39              | 0.73 ± 0.24 | -       | -      | -       | -       | -       | -       |
|                                            | <i>TOMM40</i>   | 1.09 ± 0.45              | 0.67 ± 0.36 | 1.04 ± 0.34              | 0.60 ± 0.45 | ↓*      | -      | ↑*      | -       | -       | -       |
|                                            | <i>ZNF642</i>   | 1.02 ± 0.43              | 1.94 ± 1.12 | 1.95 ± 0.53              | 0.75 ± 0.33 | -       | ↑**    | ↑**     | -       | -       | ↓**     |

**Supplementary Table II:** mRNA expression levels of genes encoding subunits of the mitochondrial complexes and energy metabolism-related enzymes in the angular gyrus in MA, iPD, PD and PDD as determined with TaqMan PCR assays using *GUS-β* for normalization. A transient increase in the mRNA expression of several genes encoding subunits of complexes I, IV and V, and encoding energy metabolism-related enzymes is observed in iPD when compared with MA. Although *NDUFA10* mRNA expression remains increased in PD when compared with MA, a significant decrease of several genes is found in PD when compared with iPD. A dramatic decrease is found in PDD when compared with iPD. *COX7A2L*, *ATP2B4*, *ATP6V1H* and *FAM82A2* mRNA expression is significantly decreased in PDD when compared with PD. Student's T-test \*p < 0.05, \*\*p < 0.01, \*\*\*p < 0.001. <sup>a</sup> No Gaussian distribution (Mann Whitney test) \*p < 0.05, \*\*p < 0.01, \*\*\*p < 0.001.

|                                            |                 | Angular Gyrus            |             |             |             |         |        |         |         |          |         |
|--------------------------------------------|-----------------|--------------------------|-------------|-------------|-------------|---------|--------|---------|---------|----------|---------|
|                                            |                 | MA                       | iPD         | PD          | PDD         | MAvsIPD | MAvsPD | iPDvsPD | MAvsPDD | iPDvsPDD | PDvsPDD |
| <b>Mitochondrial elements</b>              |                 |                          |             |             |             |         |        |         |         |          |         |
| Complex I                                  | <i>NDUFA2</i>   | 1.07 ± 0.40              | 1.34 ± 0.48 | 1.01 ± 0.24 | 0.62 ± 0.36 | -       | -      | -       | -       | ↓*       | -       |
|                                            | <i>NDUFA7</i>   | 1.06 ± 0.38              | 2.04 ± 0.66 | 1.02 ± 0.16 | 0.69 ± 0.50 | ↑**     | -      | ↓***    | -       | ↓**      | -       |
|                                            | <i>NDUFA10</i>  | 1.14 ± 0.56              | 1.85 ± 0.53 | 1.98 ± 0.81 | 0.89 ± 0.49 | ↑*      | ↑*     | -       | -       | ↓*       | -       |
|                                            | <i>NDUFB3</i>   | 1.10 ± 0.51              | 1.59 ± 0.74 | 1.03 ± 0.28 | 0.96 ± 0.37 | -       | -      | -       | -       | -        | -       |
|                                            | <i>NDUFB7</i>   | 1.05 ± 0.34              | 1.30 ± 0.46 | 1.01 ± 0.17 | 0.74 ± 0.42 | -       | -      | -       | -       | -        | -       |
|                                            | <i>NDUFB10</i>  | 1.39 ± 0.86              | 2.20 ± 0.65 | 1.36 ± 0.29 | 0.88 ± 0.60 | ↑*      | -      | ↓**     | -       | ↓**      | -       |
|                                            | <i>NDUFS7</i>   | 1.11 ± 0.46              | 1.62 ± 0.42 | 1.08 ± 0.12 | 0.83 ± 0.30 | ↑*      | -      | ↓**     | -       | ↓**      | -       |
|                                            | <i>NDUFS8</i>   | 1.03 ± 0.24              | 1.35 ± 0.45 | 0.97 ± 0.07 | 0.81 ± 0.24 | -       | -      | ↓*      | -       | -        | -       |
| Complex II                                 | <i>SDHB</i>     | 1.09 ± 0.46              | 1.55 ± 0.66 | 1.05 ± 0.23 | 0.56 ± 0.34 | -       | -      | -       | -       | ↓*       | -       |
| Complex III                                | <i>UQCRCB</i>   | 1.06 ± 0.37              | 1.71 ± 0.79 | 1.16 ± 0.20 | 0.85 ± 0.48 | ↑*      | -      | -       | -       | -        | -       |
|                                            | <i>UQCRC1</i>   | 1.10 ± 0.49              | 1.70 ± 0.66 | 1.08 ± 0.19 | 0.69 ± 0.60 | ↑*      | -      | -       | -       | ↓*       | -       |
| Complex IV                                 | <i>COX7A2L</i>  | 1.17 ± 0.73              | 2.06 ± 0.63 | 1.35 ± 0.16 | 0.71 ± 0.40 | ↑*      | -      | ↓**     | -       | ↓**      | ↓**     |
|                                            | <i>COX7C</i>    | 1.13 ± 0.58              | 1.72 ± 0.71 | 1.03 ± 0.25 | 0.72 ± 0.50 | -       | -      | -       | -       | -        | -       |
| Complex V                                  | <i>ATP5D</i>    | 1.06 ± 0.39              | 1.61 ± 0.55 | 1.15 ± 0.22 | 0.89 ± 0.49 | ↑*      | -      | -       | -       | -        | -       |
|                                            | <i>ATP5G2</i>   | 1.01 ± 0.19              | 1.25 ± 0.20 | 1.06 ± 0.30 | 0.79 ± 0.62 | ↑*      | -      | -       | -       | ↓*       | -       |
|                                            | <i>ATP5H</i>    | 1.05 ± 0.35              | 1.23 ± 0.47 | 1.00 ± 0.35 | 0.77 ± 0.56 | -       | -      | -       | -       | -        | -       |
|                                            | <i>ATP5L</i>    | 1.08 ± 0.45              | 1.33 ± 0.47 | 1.08 ± 0.32 | 0.73 ± 0.44 | -       | -      | -       | -       | -        | -       |
|                                            | <i>ATP5O</i>    | 1.12 ± 0.56              | 1.68 ± 0.62 | 1.09 ± 0.20 | 0.68 ± 0.44 | -       | -      | -       | -       | ↓*       | -       |
| <b>Energy metabolism-related molecules</b> |                 |                          |             |             |             |         |        |         |         |          |         |
|                                            | <i>ATP2B3</i>   | 1.04 ± 0.31              | 1.17 ± 0.45 | 1.04 ± 0.50 | 0.94 ± 0.68 | -       | -      | -       | -       | -        | -       |
|                                            | <i>ATP2B4</i>   | 1.05 ± 0.34              | 0.82 ± 0.27 | 0.86 ± 0.03 | 0.46 ± 0.16 | -       | -      | -       | ↓*      | ↓*       | ↓***    |
|                                            | <i>ATP4A</i>    | 1.16 ± 0.76 <sup>a</sup> | 1.02 ± 0.78 | 0.92 ± 0.07 | 0.83 ± 0.24 | -       | -      | -       | -       | -        | -       |
|                                            | <i>ATP6V0A1</i> | 1.04 ± 0.32              | 1.08 ± 0.38 | 1.03 ± 0.32 | 0.73 ± 0.39 | -       | -      | -       | -       | -        | -       |
|                                            | <i>ATP6V0B</i>  | 1.11 ± 0.49              | 2.32 ± 1.01 | 1.30 ± 0.30 | 0.82 ± 0.41 | ↑**     | -      | ↓**     | -       | ↓*       | -       |
|                                            | <i>ATP6V1H</i>  | 1.28 ± 0.84              | 3.09 ± 0.72 | 1.54 ± 0.46 | 0.58 ± 0.43 | ↑***    | -      | ↓***    | -       | ↓***     | ↓**     |
|                                            | <i>FAM82A2</i>  | 1.02 ± 0.24              | 1.36 ± 0.90 | 1.03 ± 0.18 | 0.66 ± 0.32 | -       | -      | -       | ↓*      | -        | ↓**     |
|                                            | <i>LHPP</i>     | 1.03 ± 0.26              | 1.04 ± 0.39 | 1.23 ± 0.26 | 0.62 ± 0.20 | -       | -      | -       | ↓*      | -        | ↓**     |
|                                            | <i>SLC6A6</i>   | 1.04 ± 0.31              | 1.19 ± 0.24 | 1.10 ± 0.58 | 0.81 ± 0.25 | -       | -      | -       | -       | ↓*       | -       |
|                                            | <i>SLC25A31</i> | 1.17 ± 0.66              | 1.27 ± 0.82 | 1.22 ± 0.21 | 0.88 ± 0.43 | -       | -      | -       | -       | -        | -       |
|                                            | <i>TOMM40</i>   | 1.17 ± 0.75              | 1.72 ± 0.75 | 0.93 ± 0.16 | 0.70 ± 0.64 | -       | -      | -       | -       | -        | -       |
|                                            | <i>ZNF642</i>   | 1.11 ± 0.55 <sup>a</sup> | 1.34 ± 0.32 | 1.01 ± 0.53 | 0.68 ± 0.34 | -       | -      | -       | -       | ↓**      | -       |
